# Supplementary material
Source: publisher figshare collection journal article supplement (https://karger.figshare.com/articles/dataset/_/5121076)
Supplement: Supplementary file 2 [file 1]

Supplementary Table 1

| Antibody                                                         | Manufacturer                                                        | Type                | Dilution | Labeling               |
|------------------------------------------------------------------|---------------------------------------------------------------------|---------------------|----------|------------------------|
| Primary antibodies                                               |                                                                     |                     |          |                        |
| $\alpha$ - $\alpha$ -Actinin Ab, clone EA-53                     | Sigma, Tokyo, Japan                                                 | Mouse<br>Monoclonal | 1:50     |                        |
| $\alpha$ -Desmin Ab                                              | DAKO, Copenhagen, Denmark                                           | Mouse<br>Monoclonal | 1:100    |                        |
| $\alpha$ -Myogenin (F5D) Ab                                      | Santa Cruz Biotechnology,<br>Santa Cruz, CA, USA                    | Mouse<br>Monoclonal | 1:50     |                        |
| $\alpha$ -Glyceraldehyde-3-phosphate<br>dehydrogenase (GAPDH) Ab | Ambion, Austin, TX, USA                                             | Mouse<br>Monoclonal | 1:2500   |                        |
| B.D. Living colors A.v.(JL-8)                                    | B.D. Biosciences, Franklin<br>Lakes, NJ, USA                        | Mouse<br>Monoclonal | 1:1000   |                        |
| $\alpha$ -GST Ab                                                 | Amersham Biosciences,<br>Piscataway, NJ, USA                        | Goat<br>Polyclonal  | 1:1000   |                        |
| Secondary antibodies                                             |                                                                     |                     |          |                        |
| $\alpha$ -rabbit IgG(H+L) Ab                                     | Molecular Probes, Eugene, OR,<br>USA                                | Goat                | 1:200    | Alexa Fluor 488        |
| $\alpha$ -mouse IgG(H+L) Ab                                      | Molecular Probes, Eugene, OR,<br>USA                                | Goat                | 1:200    | Alexa Fluor 546        |
| $\alpha$ -mouse IgG Ab                                           | MP Biomedicals, Solon, OH,<br>USA                                   | Rabbit              | 1:20000  | Peroxidase             |
| AffiniPure $\alpha$ -rabbit IgG(H+L) Ab                          | Jackson ImmunoResearch<br>Laboratories, Inc, West Grove,<br>PA, USA | Goat                | 1:20000  | Peroxidase             |
| AffiniPure $\alpha$ -goat IgG(H+L) Ab                            | Jackson ImmunoResearch<br>Laboratories, Inc, West Grove,<br>PA, USA | Rabbit              | 1:20000  | Peroxidase             |
| $\alpha$ -rabbit IgG Ab                                          | Amersham, Buckinghamshire,<br>UK                                    | Goat                | 1:10     | 15 nm gold<br>particle |
